# Supplementary material
Source: PubMed Central journal article supplement (PMC8804149)
Supplement: 13311_2021_1113_MOESM1_ESM.pdf [file 13311_2021_1113_MOESM1_ESM.pdf]

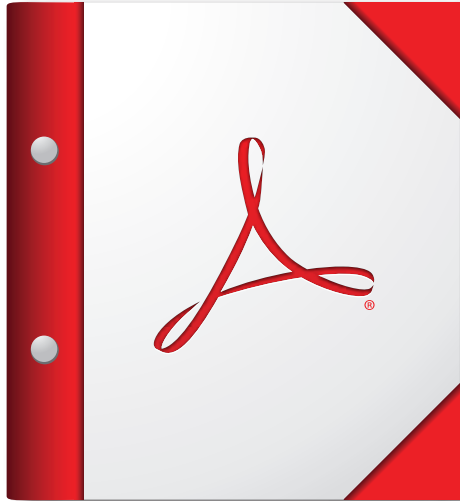

**For the best experience, open this PDF portfolio in  
Acrobat X or Adobe Reader X, or later.**

[Get Adobe Reader Now!](#)
